# Supplementary material
Source: Royal Society of Chemistry journal article supplement (doi:10.1039/d6ob00597g)
Supplement: d6ob00597g1.pdf [file d6ob00597g1.pdf]

## SUPPLEMENTARY INFORMATION

Propargyl Uridine-Based Synthesis of Glycosylated RNA Analogues

Jia-Yan Wei,<sup>a,b,c</sup> Bo-Xu Gai,<sup>a,c</sup> Chuan-Shuo Wu,<sup>a,c</sup> Li Liu,<sup>a,c</sup> and Liang Cheng<sup>a,b,c,\*</sup>

\* [chengl@iccas.ac.cn](mailto:chengl@iccas.ac.cn) (L.C.)

<sup>a</sup>*Institute of Chemistry, Chinese Academy of Sciences, Beijing 100190, China.*

<sup>b</sup>*Hangzhou Institute for Advanced Study, University of Chinese Academy of Sciences.*

<sup>c</sup>*University of Chinese Academy of Sciences, Beijing 100049, China.*

**Section S1: General information**

**Section S2: Synthesis details**

**Section S3: RNA sequences used in the study**

**Section S4: Mass spectra**

**Section S5: NMR spectra**

## Section S1: General information

All reagents were obtained from commercial suppliers or synthesized by us. The  $^1\text{H}$  NMR,  $^{13}\text{C}$  NMR and  $^{31}\text{P}$  NMR spectra were collected by Bruker 300 MHz or 400 MHz or 500 MHz spectrophotometer. Chemical shifts  $\delta$  are given in ppm relative to the residual proton signals of the deuterated solvent DMSO- $d_6$  or  $\text{CDCl}_3$  for  $^1\text{H}$ ,  $^{13}\text{C}$  and  $^{31}\text{P}$  NMR. Multiplicities are reported as follows: singlet (s), doublet (d), doublet of doublets (dd), triplet (t), quartet (q), multiplet (m). HRMS were obtained using electrospray ionization (ESI) mass spectrometer. HPLC data was collected with Waters ACQUITY H-Class equipped with an Ultimate AQ-C18 5  $\mu\text{m}$  analysis column (250  $\times$  4.6 mm) for nucleotide or nucleoside. RNA oligoes were synthesized by Suzhou Biosyntech Co., Ltd (Suzhou, China).

## Section S2: Synthesis details

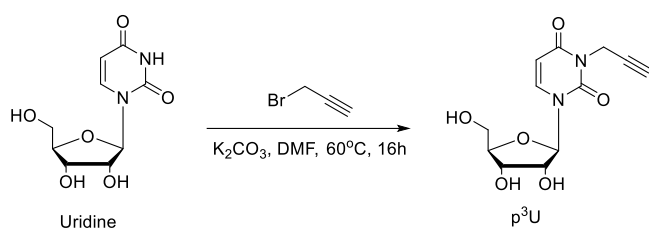

Uridine (730 mg, 2.90 mmol) was dissolved in DMF (30 mL). 3-Bromopropyne (310  $\mu\text{L}$ ) and  $\text{K}_2\text{CO}_3$  (450 mg) were added successively. The reaction mixture was stirred at 60  $^\circ\text{C}$  for 16 h, then concentrated under reduced pressure. The crude product was purified by column chromatography (dichloromethane/methanol = 20:1) to afford  $N^3$ -propargyl uridine ( $\text{p}^3\text{U}$ ) as a white solid (639 mg, 78% yield).  $^1\text{H}$  NMR (500 MHz,  $\text{DMSO}-d_6$ )  $\delta$  8.01-7.98 (d,  $J = 15.0$  Hz, 1H), 5.84-5.82 (m, 2H), 5.40-5.39 (d,  $J = 5.0$  Hz, 1H), 5.11-5.07 (m, 2H), 4.07-4.04 (m, 1H), 3.99-3.96 (q,  $J = 5.0$  Hz, 1H), 3.88-3.86 (m, 1H), 3.66-3.54 (m, 2H), 3.10-3.09 (m, 1H).<sup>[1]</sup>

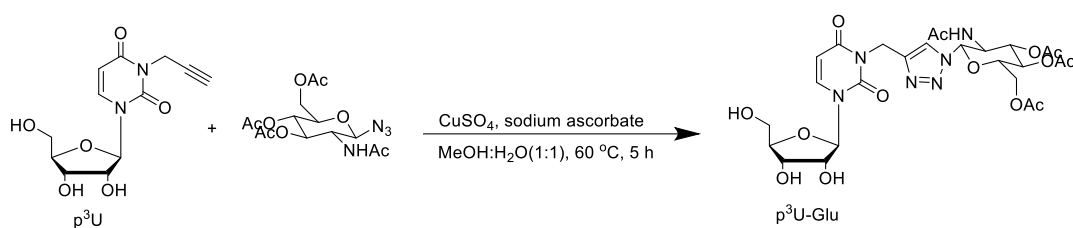

$N^3$ -Propargyl uridine ( $\text{p}^3\text{U}$ ) (150 mg, 0.54 mmol) was dissolved in MeOH/ $\text{H}_2\text{O}$  (4 mL, V/V = 1/1). 2-Acetamido-3,4,6-tri-O-acetyl-2-deoxy- $\beta$ -D-glucopyranosyl azide (201 mg, 0.54 mmol), anhydrous  $\text{CuSO}_4$  (81.4 mg, 0.51 mmol), and sodium ascorbate (101 mg, 0.51 mmol) were added. The reaction mixture was stirred at 60  $^\circ\text{C}$  for 5 h, filtered, and concentrated under reduced pressure to give the crude product. Purification by column chromatography (dichloromethane/methanol = 6:1) afforded a white solid (248 mg, 68% yield).  $^1\text{H}$  NMR (500 MHz,  $\text{DMSO}-d_6$ )  $\delta$  8.09 (s, 1H), 8.05-8.00 (m, 2H), 6.11-6.09 (d,  $J = 10.0$  Hz, 1H), 5.82-5.80 (m, 2H), 5.40-5.32 (m, 2H), 5.12-5.06 (m, 4H), 4.99-4.96 (m, 1H), 4.57-4.51 (q,  $J = 10.0$  Hz, 1H), 4.22-4.19 (m, 1H), 4.16-4.12 (dd,  $J = 12.5, 5.0$  Hz, 1H), 4.06-4.05 (m, 2H), 3.98 (s, 1H), 3.87-3.85 (m, 1H), 3.67-3.64 (m, 1H), 3.58-3.54 (m, 1H), 2.003-1.995 (d,  $J = 4.0$  Hz, 6H), 1.94 (s, 3H), 1.58 (s, 3H).  $^{13}\text{C}$  NMR (125 MHz,  $\text{DMSO}-d_6$ )  $\delta$  169.9, 169.5, 169.4, 169.2, 161.4, 150.5, 142.7, 139.4, 122.2, 100.8, 89.1, 84.7, 84.5, 73.7, 73.4, 72.3, 69.5, 68.0, 61.8, 60.5, 52.0, 35.6, 22.2, 20.4, 20.3, 20.2. HRMS-ESI:  $m/z$  calculated for  $\text{C}_{26}\text{H}_{34}\text{N}_6\text{O}_{14}\text{Na}^+$  [ $\text{M}+\text{Na}$ ] $^+$ : 677.20250, found: 677.20252.

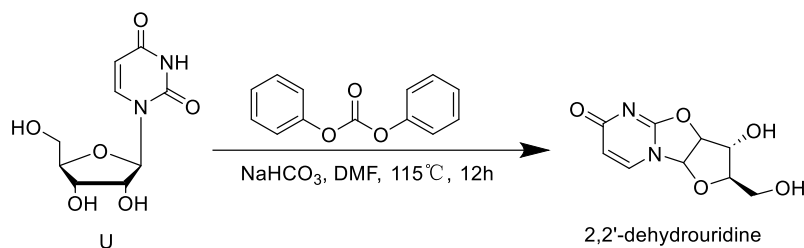

Uridine (200 mg, 0.82 mmol) was dissolved in DMF (900  $\mu\text{L}$ ). Diphenyl carbonate (186 mg, 0.9 mmol) and sodium bicarbonate (6.4 mg, 0.02 mmol) were added, and the reaction mixture was stirred at 115  $^\circ\text{C}$  for 12 h. The reaction was cooled to room temperature, evaporated to dryness and dissolved in methanol. A large amount of white solid precipitated out, which was filtered to afford 2,2'-*O*-anhydrouridine as a white solid (58 mg, 31% yield).  $^1\text{H}$  NMR (300 MHz,  $\text{DMSO-}d_6$ )  $\delta$  7.85-7.82 (d,  $J = 7.5$  Hz, 1H), 6.31-6.29 (d,  $J = 5.7$  Hz, 1H), 5.88-5.83 (m, 2H), 5.20-5.18 (d,  $J = 5.7$  Hz, 1H), 4.99-4.96 (t,  $J = 5.1$  Hz, 1H), 4.38 (m, 1H), 4.08-4.07 (m, 1H), 3.28-3.15 (m, 2H).<sup>[2]</sup>

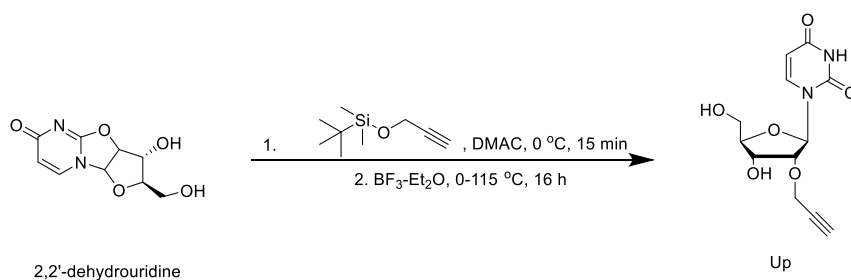

2,2'-*O*-Anhydrouridine (226 mg, 1 mmol) was dissolved in DMAC, and the air was replaced with nitrogen. Under a nitrogen atmosphere, *tert*-butyldimethyl(2-propynyloxy)silane (1.01  $\mu\text{L}$ ) was added. Boron trifluoride diethyl etherate (309  $\mu\text{L}$ ) was added dropwise at 0  $^\circ\text{C}$ , and stirring was continued at 0  $^\circ\text{C}$  for 15 min. The reaction mixture was heated to 115  $^\circ\text{C}$  and stirred for 16 h. The mixture was filtered and concentrated under reduced pressure to give the crude product. Purification by column chromatography (dichloromethane/methanol = 10:1) afforded 2'-*O*-propargyl uridine (Up) as a white solid (85 mg, 30% yield).  $^1\text{H}$  NMR (500 MHz,  $\text{DMSO-}d_6$ )  $\delta$  11.3 (s, 1H), 7.93-7.91 (d,  $J = 8.0$  Hz, 1H), 5.88-5.87 (d,  $J = 5.5$  Hz, 1H), 5.66-5.64 (d,  $J = 8.0$  Hz, 1H), 5.23-5.22 (m, 1H), 5.16-5.14 (m, 1H), 4.32-4.21 (m, 2H), 4.15-4.13 (m, 1H), 4.10-4.06 (m, 1H), 3.88-3.86 (m, 1H), 3.65-3.54 (m, 2H), 3.41-3.40 (t,  $J = 2.5$  Hz, 1H), 3.07-3.03 (q,  $J = 7.5$  Hz, 2H). HRMS-ESI:  $m/z$  calculated for  $\text{C}_{12}\text{H}_{14}\text{N}_2\text{O}_6\text{Na}^+$   $[\text{M}+\text{Na}]^+$ : 305.07441, found: 305.07364.<sup>[3]</sup>

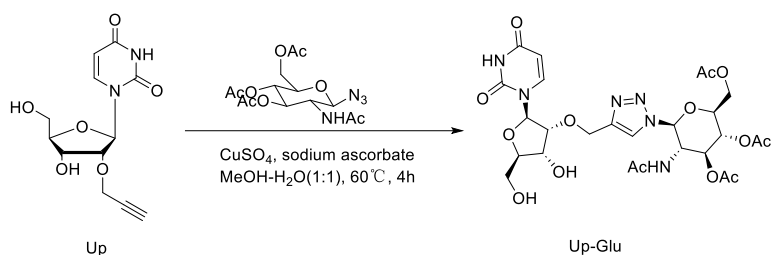

2'-O-Propargyl uridine (Up) (85 mg, 0.3 mmol) was dissolved in MeOH/H<sub>2</sub>O (4 mL, V/V = 1/1). 2-Acetamido-3,4,6-tri-O-acetyl-2-deoxy-β-D-glucopyranosyl azide (112 mg, 0.3 mmol), anhydrous CuSO<sub>4</sub> (52 mg, 0.3 mmol), and sodium ascorbate (60 mg, 0.3 mmol) were added. The reaction mixture was stirred at 60 °C for 4 h, filtered, and concentrated under reduced pressure to give the crude product. Purification by column chromatography (dichloromethane/methanol = 10:1) afforded a white solid (93 mg, 46% yield). <sup>1</sup>H NMR (400 MHz, DMSO-*d*<sub>6</sub>) δ 11.34 (br s, 1H), 8.28 (s, 1H), 8.12-8.10 (d, *J* = 9.2 Hz, 1H), 7.91-7.88 (d, *J* = 8.4 Hz, 1H), 6.12-6.09 (d, *J* = 10.0 Hz, 1H), 5.90-5.89 (d, *J* = 4.4 Hz, 1H), 5.63-5.61 (d, *J* = 8.4 Hz, 1H), 5.38-5.33 (t, *J* = 10.0 Hz, 1H), 5.11-5.06 (t, *J* = 9.6 Hz, 1H), 4.70 (s, 2H), 4.60-4.52 (q, *J* = 9.6 Hz, 1H), 4.33-4.22 (m, 1H), 4.18-4.14 (m, 2H), 4.07-4.03 (m, 2H), 3.89-3.86 (m, 1H), 3.67-3.64 (m, 1H), 3.58-3.54 (m, 1H), 3.17 (s, 2H), 2.000-1.998 (s+s, 6H), 1.95 (s, 3H), 1.59 (s, 3H). <sup>13</sup>C NMR (100 MHz, DMSO-*d*<sub>6</sub>) δ 170.5, 170.1, 169.8, 163.5, 150.7, 144.3, 140.7, 123.3, 102.1, 86.7, 85.13, 85.06, 81.0, 73.8, 72.6, 68.5, 68.4, 63.0, 62.0, 60.6, 52.5, 48.8, 22.5, 20.7, 20.6, 20.5. HRMS-ESI: *m/z* calculated for C<sub>26</sub>H<sub>33</sub>N<sub>6</sub>O<sub>14</sub><sup>-</sup> [M-H]<sup>-</sup>: 653.20602, found: 653.20782.

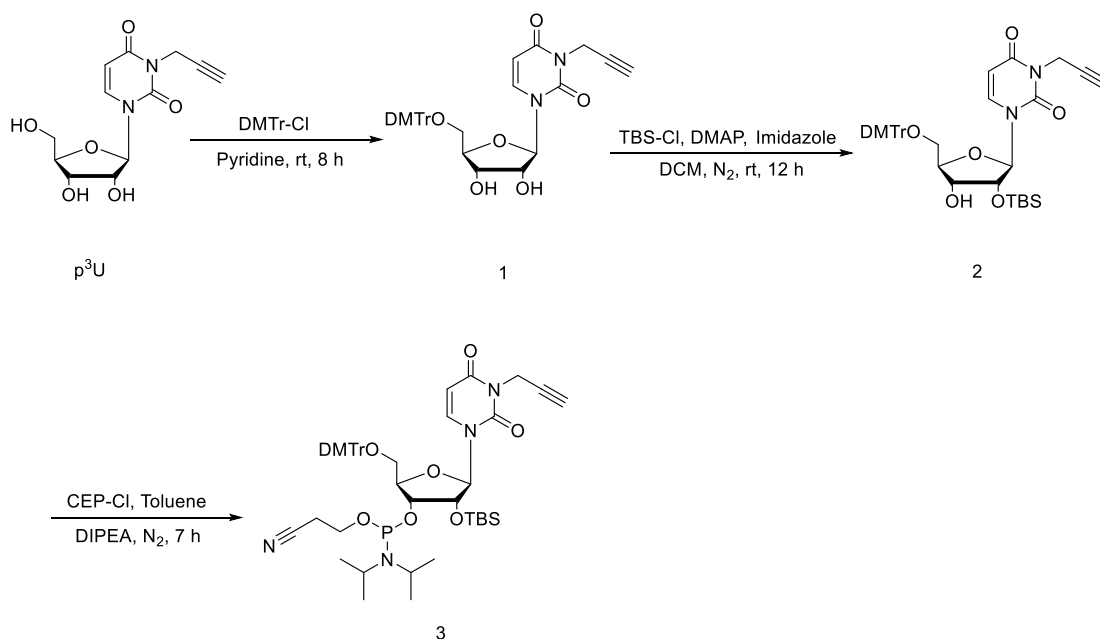

Synthesis of **1**: N<sup>3</sup>-Propargyl uridine (p<sup>3</sup>U) (2.6 g, 9.2 mmol) was dissolved in dry pyridine 10 mL). 4,4'-Dimethoxytrityl chloride (6.3 g, 18.4 mmol) was added, and the reaction was carried out under nitrogen protection at room temperature for 8 h. The reaction mixture was concentrated directly, dissolved in CH<sub>2</sub>Cl<sub>2</sub> (200 mL), and washed successively with 5% NaHCO<sub>3</sub> solution (200 mL) and saturated NaCl solution (200 mL). The organic phase was separated, dried over anhydrous Na<sub>2</sub>SO<sub>4</sub>, filtered, and concentrated. Purification by column chromatography (dichloromethane/ethyl acetate = 30:1) afforded the product as a white foam (1.37 g, 25% yield). <sup>1</sup>H NMR (300 MHz, DMSO-*d*<sub>6</sub>) δ 7.84-7.81 (d, *J* = 8.4 Hz, 1H), 7.39-7.24 (m, 9H), 6.92-6.89 (d, *J* = 8.7 Hz, 4H), 5.794-5.785 (d, *J* = 2.7 Hz, 1H), 5.58-5.57 (d, *J* = 4.5 Hz, 1H), 5.47-5.44 (d, *J* = 8.1 Hz, 1H), 5.21-5.19 (d, *J* = 5.4 Hz, 1H), 4.52-4.51 (d, *J* = 2.1 Hz, 2H), 4.10-3.99 (m, 4H), 3.74 (s, 6H), 3.28-3.21 (m, 2H), 3.14-3.13 (m, 1H). <sup>13</sup>C NMR (126 MHz, CDCl<sub>3</sub>) δ 161.6, 158.8, 151.1, 144.4, 138.6, 135.4, 135.2, 130.2, 128.2, 128.1, 127.2, 113.4, 101.6, 91.4, 87.2, 84.5, 78.1, 76.1, 70.9, 70.8, 62.6, 55.4, 30.0. HRMS-ESI: *m/z* calculated for C<sub>33</sub>H<sub>32</sub>N<sub>2</sub>O<sub>8</sub>Na<sup>+</sup> [*M*+Na]<sup>+</sup>: 607.20510, found: 607.20509.

Synthesis of **2**: Compound **1** (1.37 g, 2.34 mmol) was dissolved in dry dichloromethane (10 mL). *Tert*-Butyldimethylsilyl chloride (530 mg, 3.5 mmol), imidazole (797 mg, 11.7 mmol), and 4-dimethylaminopyridine (29 mg, 0.23 mmol) were added. The reaction was stirred at room temperature under nitrogen atmosphere for 12 h. Purification by column chromatography (dichloromethane/ethyl acetate = 100/1-80/1) afforded a white foam (527 mg, 32% yield). <sup>1</sup>H NMR (400 MHz, CDCl<sub>3</sub>) δ 7.94-7.92 (d, *J* = 8.0 Hz, 1H), 7.20 (m), 6.85-6.83 (d, *J* = 8.4 Hz, 4H), 6.01-6.00 (m, 1H), 5.39-5.37 (d, *J* = 8.0 Hz, 1H), 4.69 (m, 2H), 4.35 (m, 2H), 4.15-4.09 (m, 3H), 3.80 (s, 6H), 3.53-3.46 (m, 2H), 0.92 (s, 9H), 0.17-0.15 (s+s, 6H). <sup>13</sup>C NMR (126 MHz, CDCl<sub>3</sub>) δ 162.0, 158.89, 158.86, 150.3, 144.4, 138.6, 135.3, 135.1, 130.3, 130.2, 128.23, 128.18, 127.4, 113.47, 113.46, 101.9, 89.4, 87.4, 83.8, 78.4, 76.6, 70.8, 70.7, 62.6, 55.4, 30.3, 25.8, 18.2, -4.5, -5.1. HRMS-ESI: *m/z* calculated for C<sub>39</sub>H<sub>46</sub>N<sub>2</sub>O<sub>8</sub>SiNa<sup>+</sup> [*M*+Na]<sup>+</sup>: 721.29156, found: 721.29160.

Synthesis of **3**: Compound **2** (86 mg, 0.12 mmol) was dissolved in dry toluene (4 mL). Under nitrogen atmosphere, *N,N*-diisopropylethylamine (105 μL, 0.6 mmol) and 2-cyanoethyl *N,N*-diisopropylchlorophosphoramidite (110 μL, 0.5 mmol) were added. The mixture was stirred at room temperature for 7 h. Purification by column chromatography (petroleum ether/ethyl acetate = 2:1) afforded the product as a white foam as a mixture of diastereoisomers with some remaining **2** (50 mg, 46% yield). <sup>1</sup>H NMR (300 MHz, CDCl<sub>3</sub>) δ 8.16-8.13 (m, 1H), 7.38-7.24 (m), 6.86-6.83 (m, 4H), 6.14 (m, 1H), 5.39-5.35 (m, 1H), 5.30-5.31 (m, 2H), 4.69 (m, 2H), 4.32 (m, 2H), 4.12 (m, 1H), 3.81-3.80 (m, 6H), 3.66 (m, 2H), 3.33-3.32 (m, 1H), 2.59-2.58 (m, 2H), 2.17-2.16 (m, 1H), 1.26 (m), 0.80 (m, 9H), 0.09-0.01 (m). <sup>13</sup>C NMR (126 MHz, CDCl<sub>3</sub>) δ

161.9, 161.8, 150.5, 150.4, 144.4, 144.3, 138.7, 138.6, 135.4, 135.3, 135.2, 135.0, 130.4, 130.2, 128.4, 128.1, 127.4, 117.8, 117.4, 113.4, 101.9, 101.8, 89.3, 88.8, 87.5, 87.3, 83.36, 83.33, 83.2, 78.21, 78.18, 76.2, 76.1, 75.50, 75.46, 72.51, 72.46, 72.4, 72.3, 70.7, 63.0, 62.5, 58.9, 58.8, 57.9, 57.7, 43.5, 43.4, 43.1, 43.0, 24.9, 24.8, 24.7, 20.7, 20.6, 20.4, 20.3, 18.2, -4.60, -4.64. <sup>31</sup>P NMR (162 MHz, DMSO-*d*<sub>6</sub>) δ 149.12, 148.54. HRMS-ESI: *m/z* calculated for C<sub>48</sub>H<sub>63</sub>N<sub>4</sub>O<sub>9</sub>PSiNa<sup>+</sup> [M+Na]<sup>+</sup>: 921.39940, found: 921.39832.

### Section S3: RNA sequences used in the study

The RNA oligos were synthesized following the standard protocol with an RNA solid-phase synthesizer (Suzhou Biosyntech Co., Ltd (Suzhou, China)).

**Table S1. RNA sequences**

| Name                 | Sequences                            |
|----------------------|--------------------------------------|
| p <sup>3</sup> U-RNA | 5'-CAUGXUGCA-3' (X=p <sup>3</sup> U) |
| Up-RNA               | 5'-CAUGYUGCA-3' (Y=Up)               |

### RNA reaction

#### p<sup>3</sup>U -RNA

The modified RNA strand (5 OD) was dissolved in DEPC-treated water, and its concentration was determined to be 2123.6 ng/μL using a NanoDrop spectrophotometer. Stock solutions were prepared as follows: CuSO<sub>4</sub>, NaACS and THPTA (0.5 mmol each) were dissolved in 1 mL of DEPC-treated water; 2-acetamido-3,4,6-tri-O-acetyl-2-deoxy-β-D-glucopyranosyl azide (0.5 mmol) was dissolved in 1 mL of DMSO; MopS and NaCl (0.5 mmol each) were dissolved in 1 mL of DEPC-treated water. To 2 μL of the RNA solution were added 2 μL of CuSO<sub>4</sub> solution, 2 μL of THPTA solution, 10 μL of MopS solution, 10 μL of NaCl solution, followed by 2 μL of NaACS solution and 2 μL of 2-acetamido-3,4,6-tri-O-acetyl-2-deoxy-β-D-glucopyranosyl azide solution. Subsequently, 24 μL of DEPC-treated water and 48 μL of DMSO were added to afford a total reaction volume of 100 μL. The reaction mixture was vortexed and incubated at 37 °C for 12 h. After the reaction, ethanol precipitation was carried out. The product was analyzed by HPLC.

#### Up-RNA

The modified RNA strand (2 OD) was dissolved in DEPC-treated water, and its concentration was determined to be 1727.2 ng/μL using a NanoDrop spectrophotometer. Stock solutions were prepared as follows: CuSO<sub>4</sub>, NaACS, and THPTA solutions (0.5 mmol each) were dissolved in

1 mL of DEPC-treated water; 2-acetamido-3,4,6-tri-O-acetyl-2-deoxy- $\beta$ -D-glucopyranosyl azide (0.5 mmol) was dissolved in 1 mL of DMSO; Mops and NaCl (0.5 mmol each) were dissolved in 1 mL of DEPC-treated water. To 2  $\mu$ L of the RNA solution were added 2  $\mu$ L of CuSO<sub>4</sub> solution, 2  $\mu$ L of THPTA solution, 10  $\mu$ L of Mops solution, 10  $\mu$ L of NaCl solution, followed by 2  $\mu$ L of NaACS solution and 2  $\mu$ L of 2-acetamido-3,4,6-tri-O-acetyl-2-deoxy- $\beta$ -D-glucopyranosyl azide solution. Then 24  $\mu$ L of DEPC-treated water and 48  $\mu$ L of DMSO were added to give a total reaction volume of 100  $\mu$ L. The reaction mixture was vortexed and incubated at 37 °C for 12 h. After completion of the reaction, ethanol precipitation was performed. The product was analyzed by HPLC.

### **Ethanol precipitation**

To a centrifuge tube was added 360  $\mu$ L of anhydrous ethanol. The tube was stored at -80 °C in a refrigerator for 5 h, then centrifuged at 15000 rpm and 4 °C for 30 min. The supernatant was discarded, and the pellet was washed twice with 500  $\mu$ L of 75% ethanol, followed by centrifugation at 15000 rpm for 5 min each time. The pellet was air dried at room temperature for 5 min, then dissolved in 30  $\mu$ L of DEPC treated water. The RNA concentration was determined using a NanoDrop spectrophotometer.

### **HPLC analysis**

The HPLC analysis of the reaction mixture was performed using a Waters acquity H-Class system equipped with an Ultimate AQ-C18 analytical column (5  $\mu$ m, 250  $\times$  4.6 mm). The mobile phase consisted of TEAA buffer (triethylammonium acetate, 100 mM, pH 7.2) and acetonitrile. The gradient elution program was as follows: a reduction from 93% TEAA buffer to 85% for 15 minutes, followed by a gradual increase to 93% TEAA buffer over 16 to 20 minutes, maintained at this concentration for 5 minutes, with a total duration of 25 minutes. The detection wavelength was set at 260 nm. For analysis, the reaction mixture was diluted with 30  $\mu$ L of DEPC-treated water in a capped HPLC bottle, and 15  $\mu$ L of the diluted solution was injected.

### **Enzymatic digestion of the RNA strand**

An aliquot of the product RNA strand solution was digested by adding 0.6  $\mu$ L of CIP enzyme solution (1 U/ $\mu$ L, NEB M0290L), 0.6  $\mu$ L of 0.3 M sodium acetate solution, and 0.6  $\mu$ L of Nuclease P1 solution (0.1 U/ $\mu$ L, Sigma N8630-1VL). The mixture was vortexed and incubated at 37 °C overnight. The resulting mixture was analyzed by HPLC.

### **HPLC analysis of Enzymatic digestion**

HPLC analysis of the reaction mixture was performed on a Waters ACQUITY H-Class system equipped with an Ultimate AQ-C18 analytical column (5  $\mu$ m, 250  $\times$  4.6 mm). The mobile phase

consisted of TEAA buffer (triethylammonium acetate, 100 mM, pH 7.2) and acetonitrile. The gradient elution program was set as follows: 95% TEAA buffer was maintained for the first 6 min, then linearly decreased to 0% over 9 min and held for 10 min. Subsequently, the proportion of TEAA buffer was gradually increased back to 95% from 31 to 35 min and maintained for 3 min. The total run time was 38 min. The detection wavelength was 260 nm. For analysis, the reaction mixture was diluted with 30  $\mu$ L of DEPC-treated water in an HPLC vial with an insert, and 25  $\mu$ L of the resulting solution was injected.

## Section S4: Mass Spectra

wjy-0901 #15 RT: 0.11 AV: 1 NL: 1.16E8  
T: FTMS + p ESI Full ms [100.0000-1000.0000]

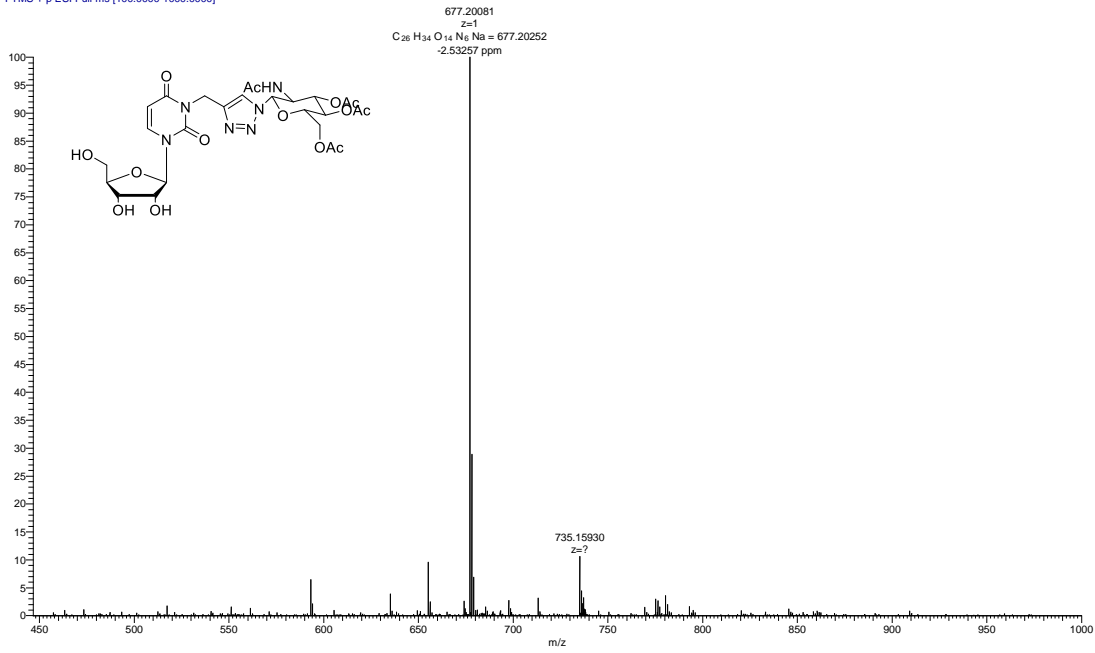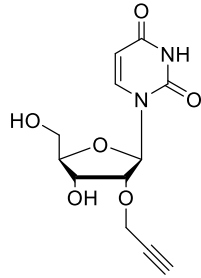

WJY-0925 #23 RT: 0.17 AV: 1 NL: 1.22E8  
T: FTMS + p ESI Full ms [100.0000-1000.0000]

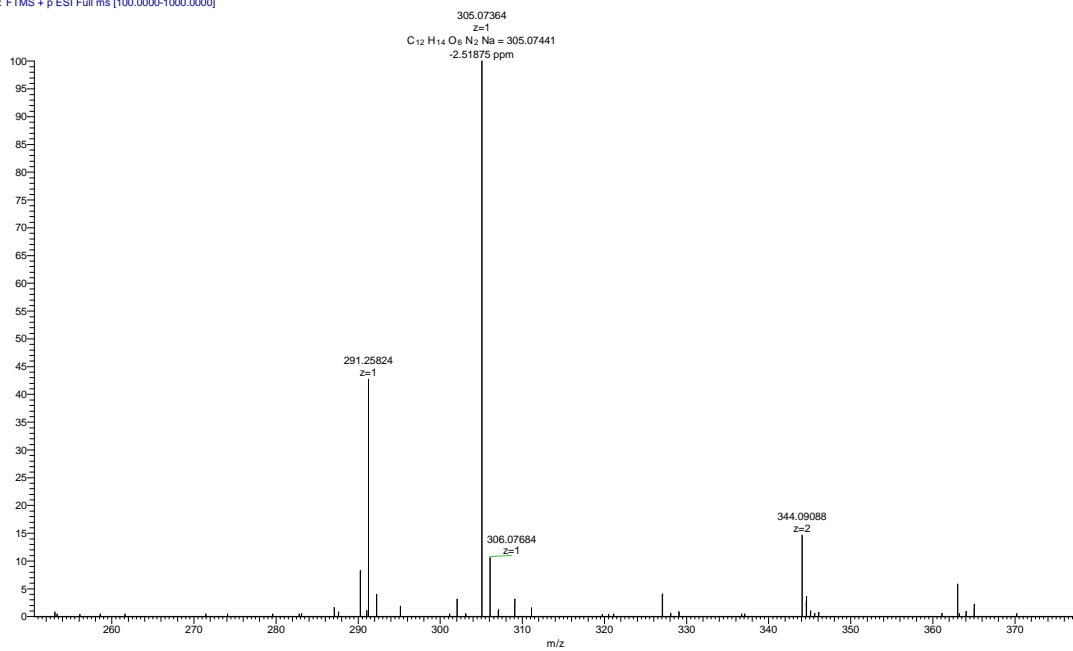

WJY-0928-2 #24 RT: 0.18 AV: 1 NL: 2.42E8  
T: FTMS + p ESI Full ms [100.0000-1000.0000]

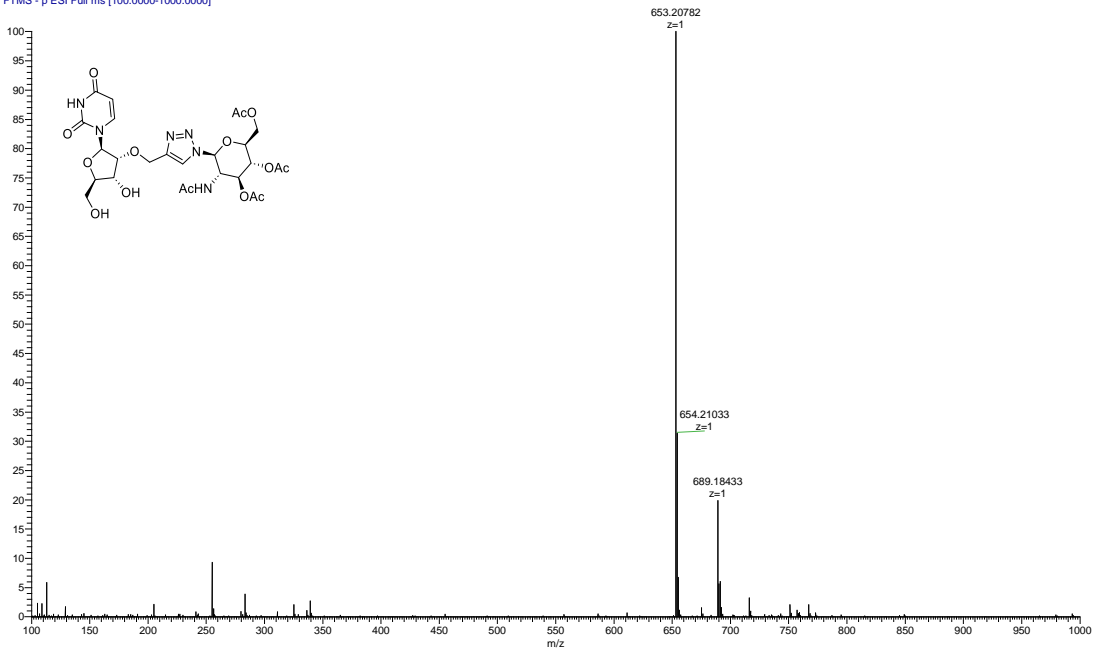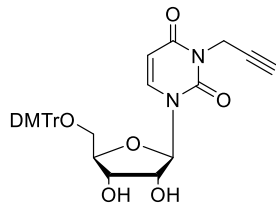

WJY-0910-4 #17 RT: 0.13 AV: 1 NL: 5.47E8  
T: FTMS + p ESI Full ms [100.0000-1000.0000]

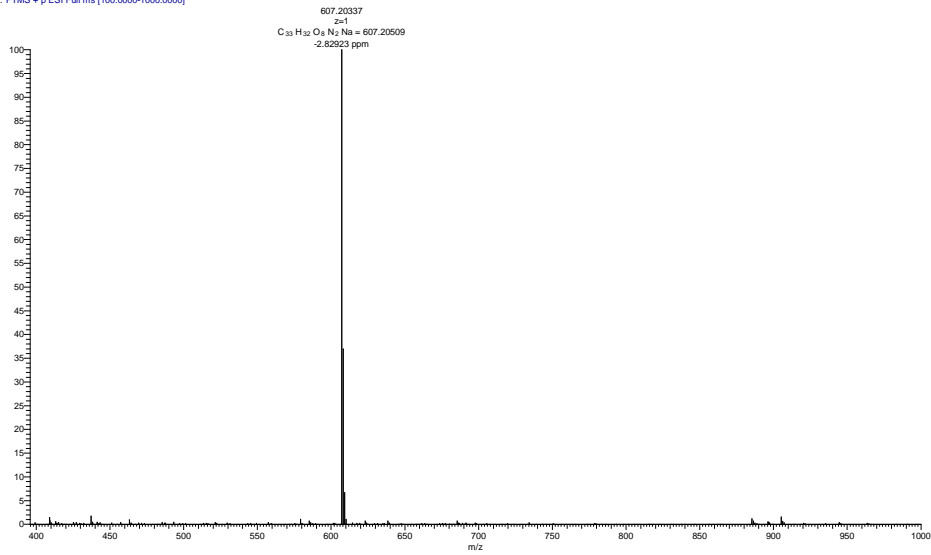

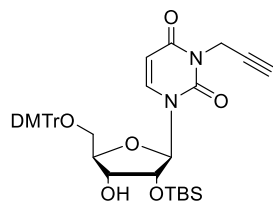

WJY-42 #25 RT: 0.19 AV: 1 NL: 1.18E8  
T: FTMS + p ESI Full ms [100.0000-1000.0000]

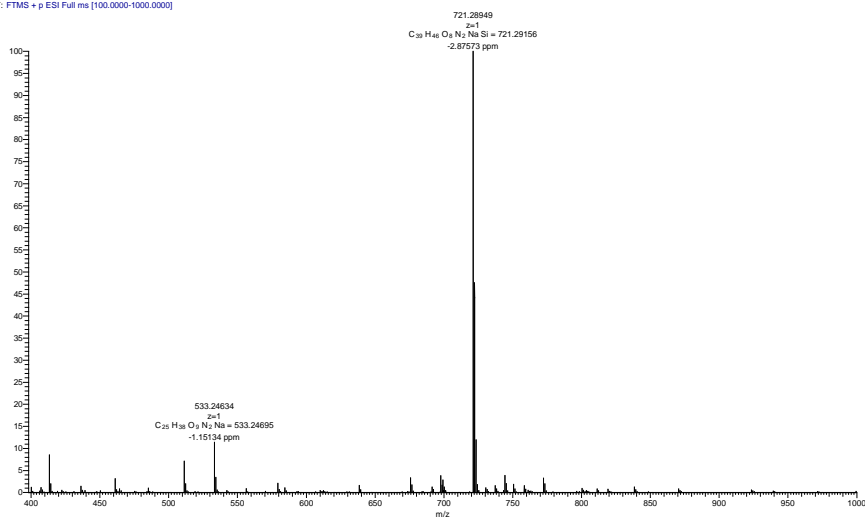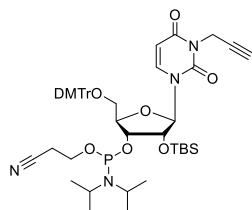

WJY-1230-2 #17 RT: 0.13 AV: 1 NL: 3.97E8  
T: FTMS + p ESI Full ms [100.0000-1000.0000]

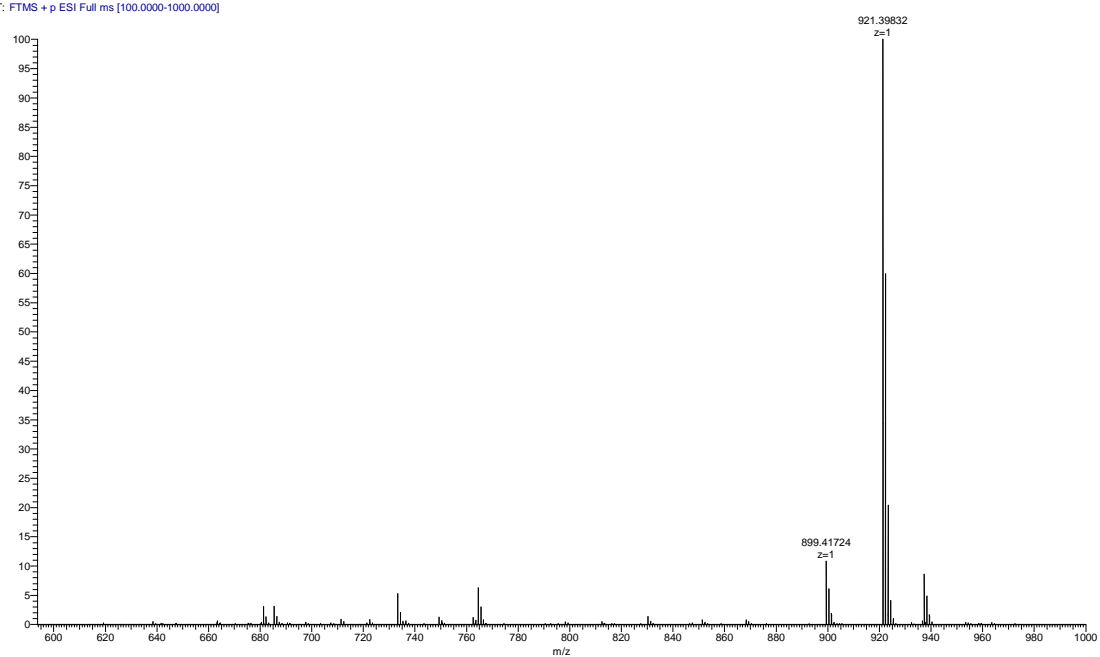

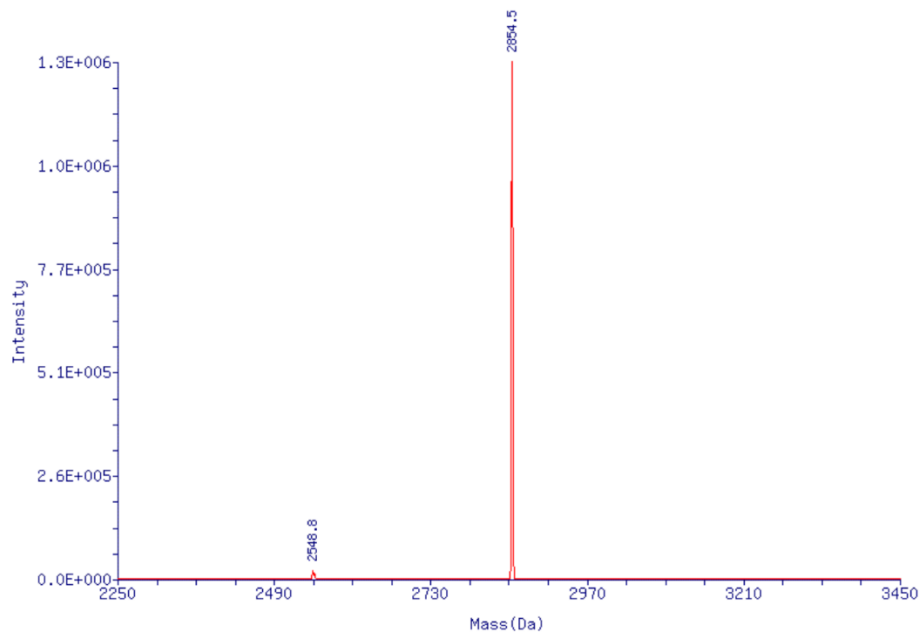

Figure S1: Mass spectrum of 5'-CAUG(p<sup>3</sup>U)UGCA-3'

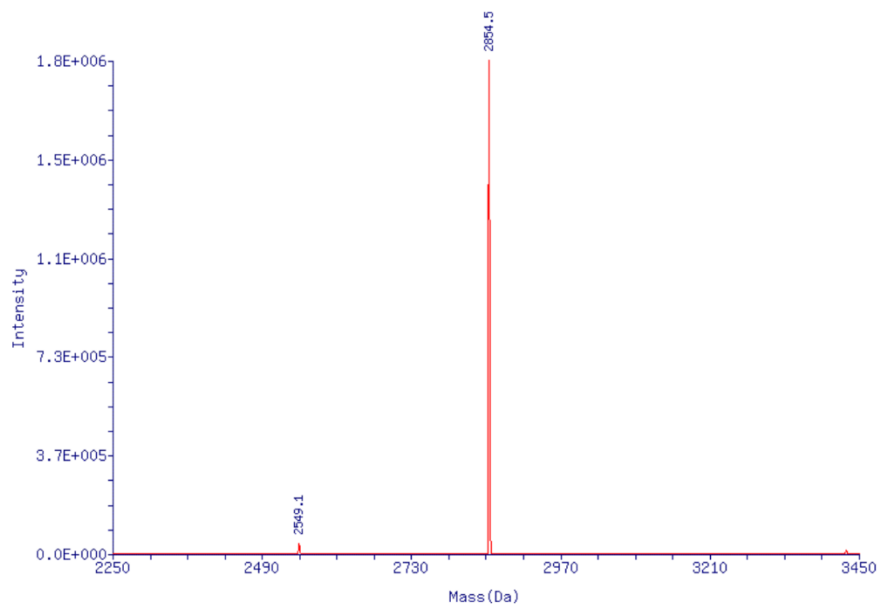

Figure S2: Mass spectrum of 5'-CAUGY(U<sub>p</sub>)UGCA-3'

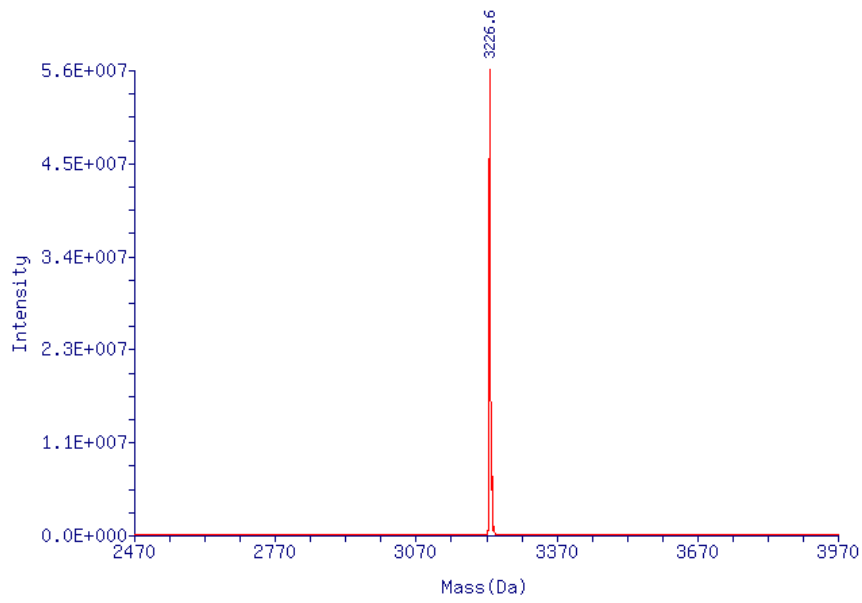

Figure S3: Mass spectrum of 5'-CAUG(p<sup>3</sup>U-Glu)UGCA-3'

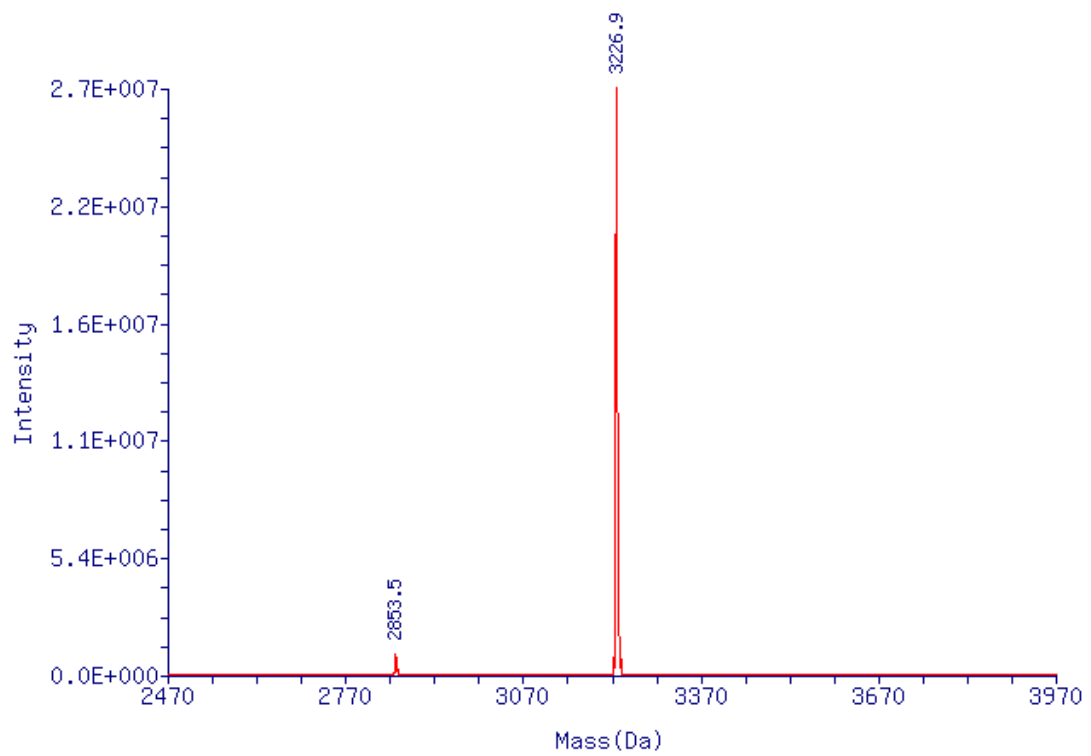

Figure S4: Mass spectrum of 5'-CAUG(U<sub>p</sub>-Glu)UGCA-3'

## Section S5: NMR spectra

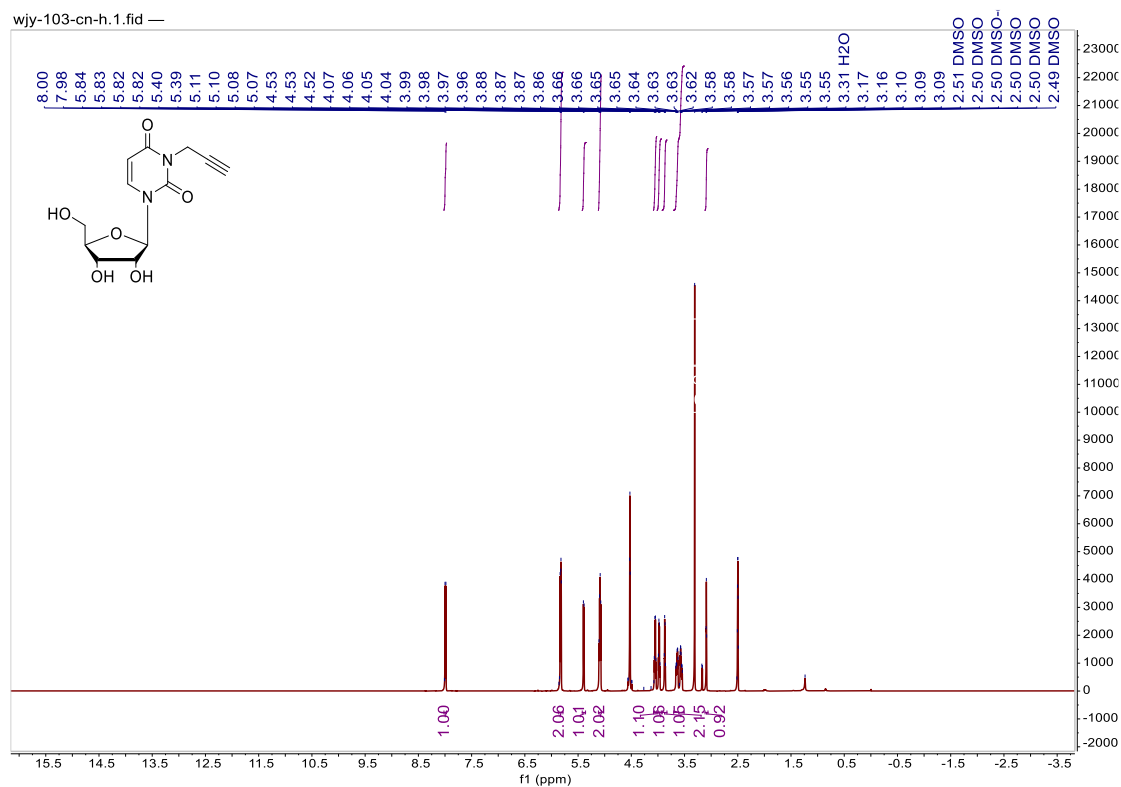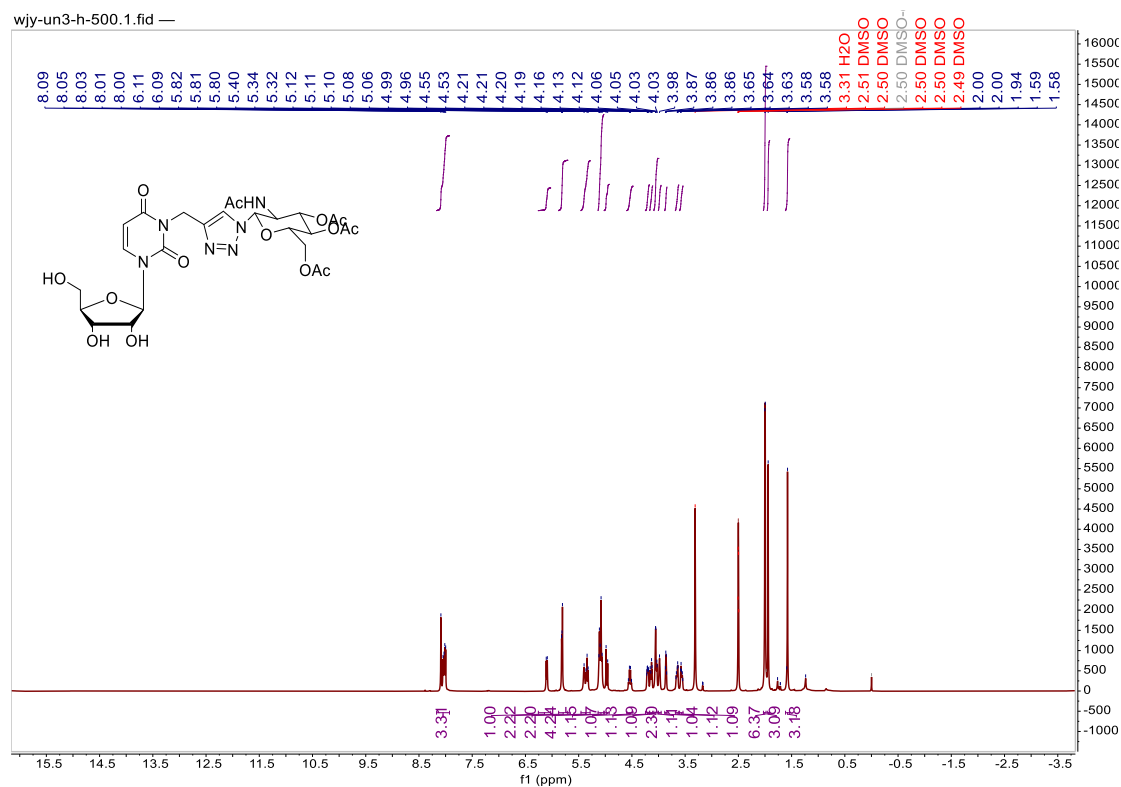

wjy-un3-c-500.2.fid —

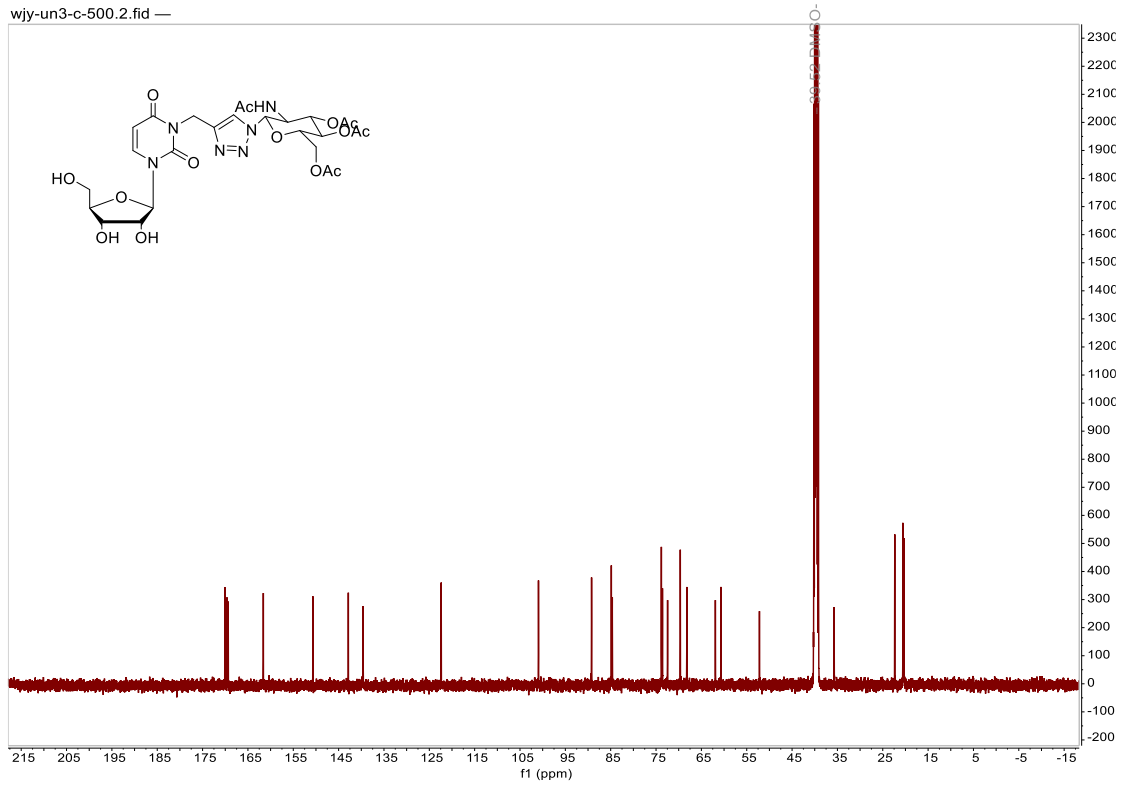

WJY-DN1-917.1.fid —

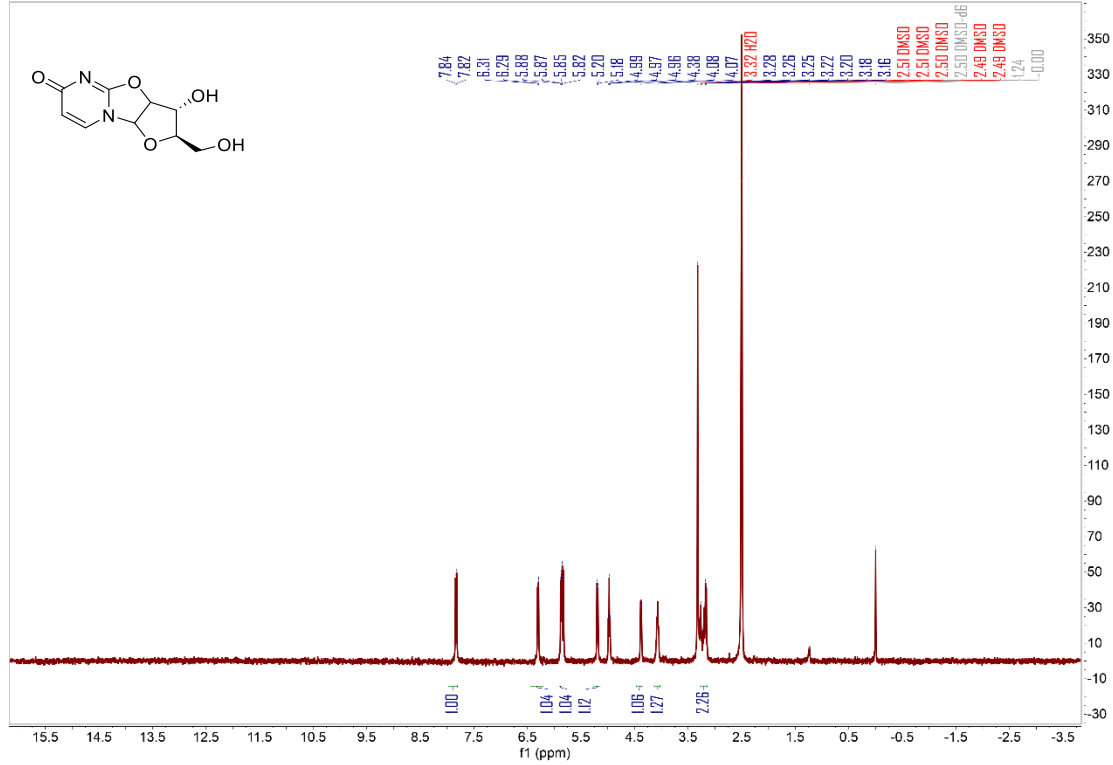

wjy-on2-924-h-500.1.fid —

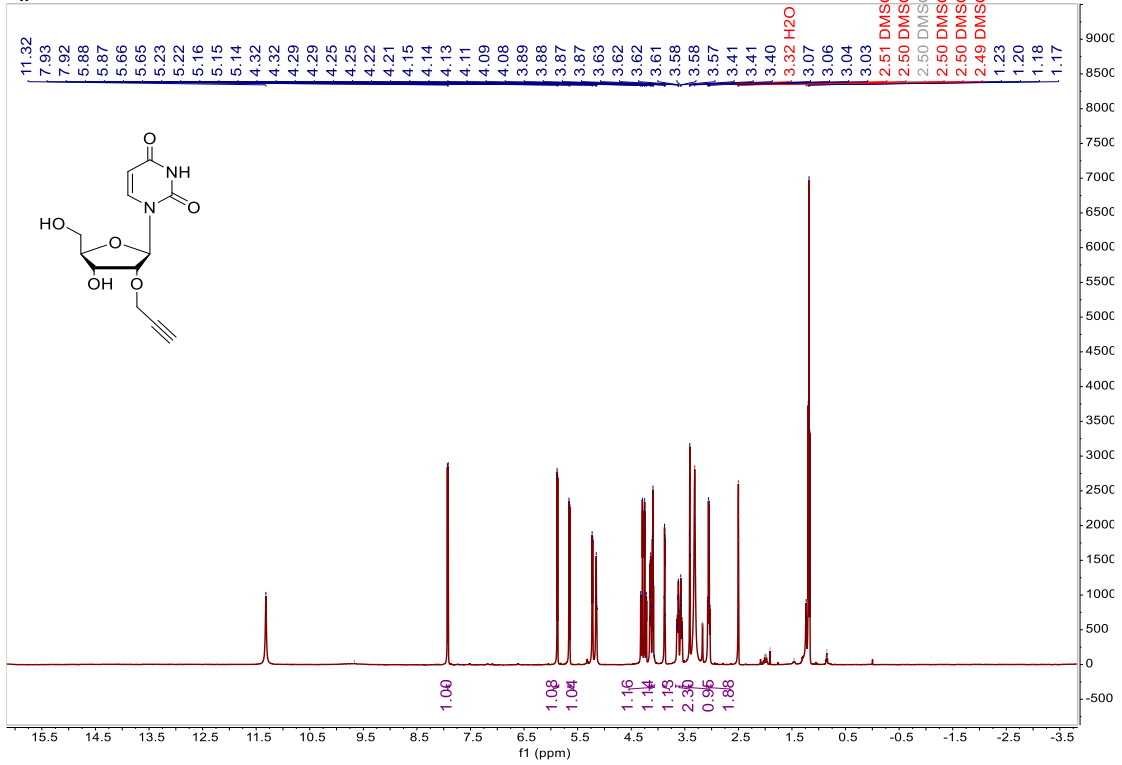

WJY-ONT-928-H.1.fid —

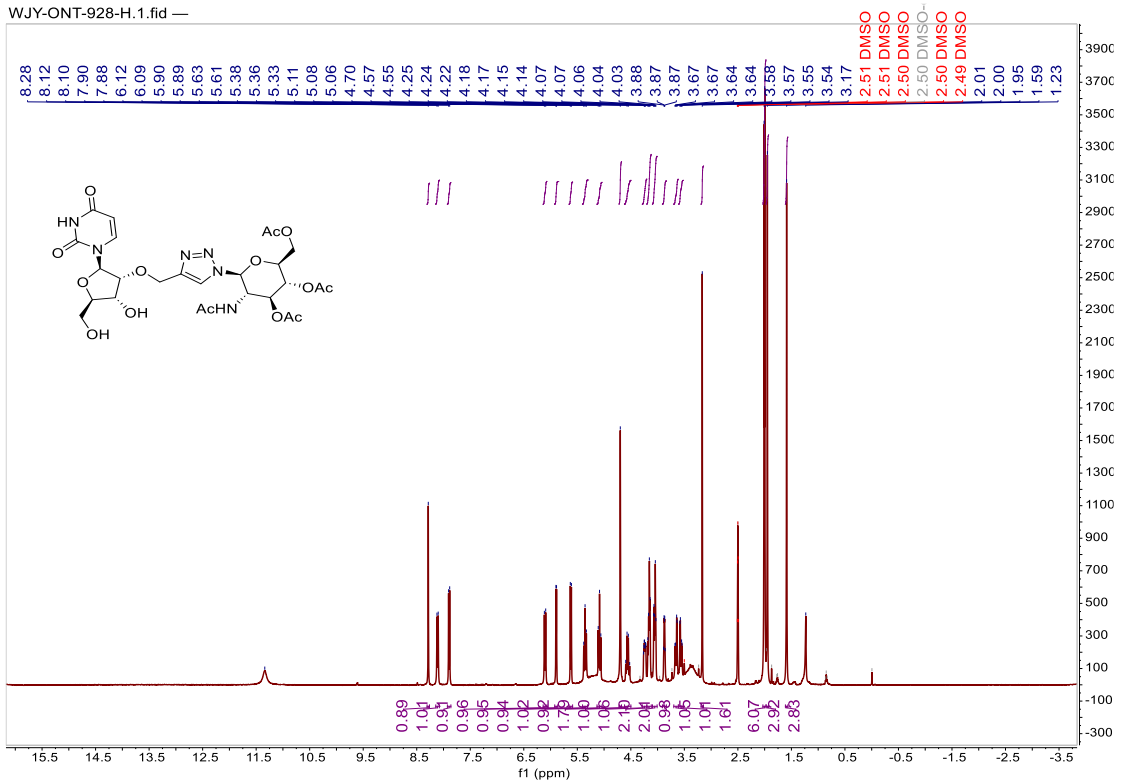



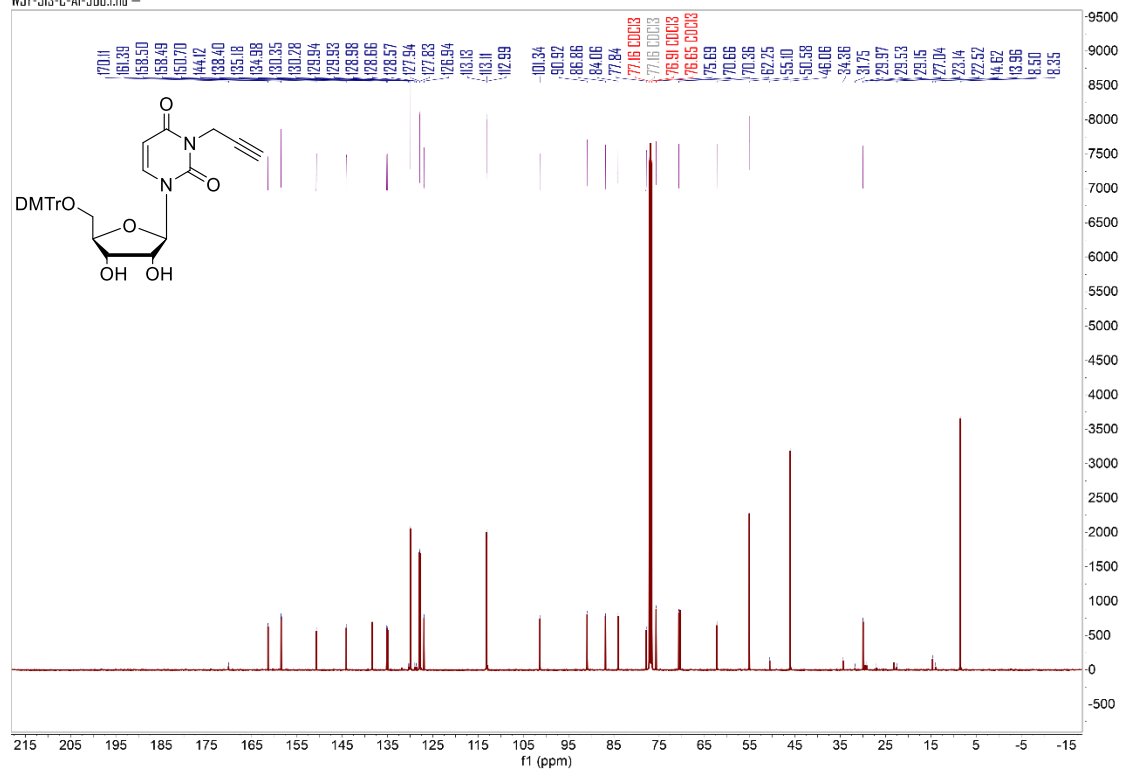

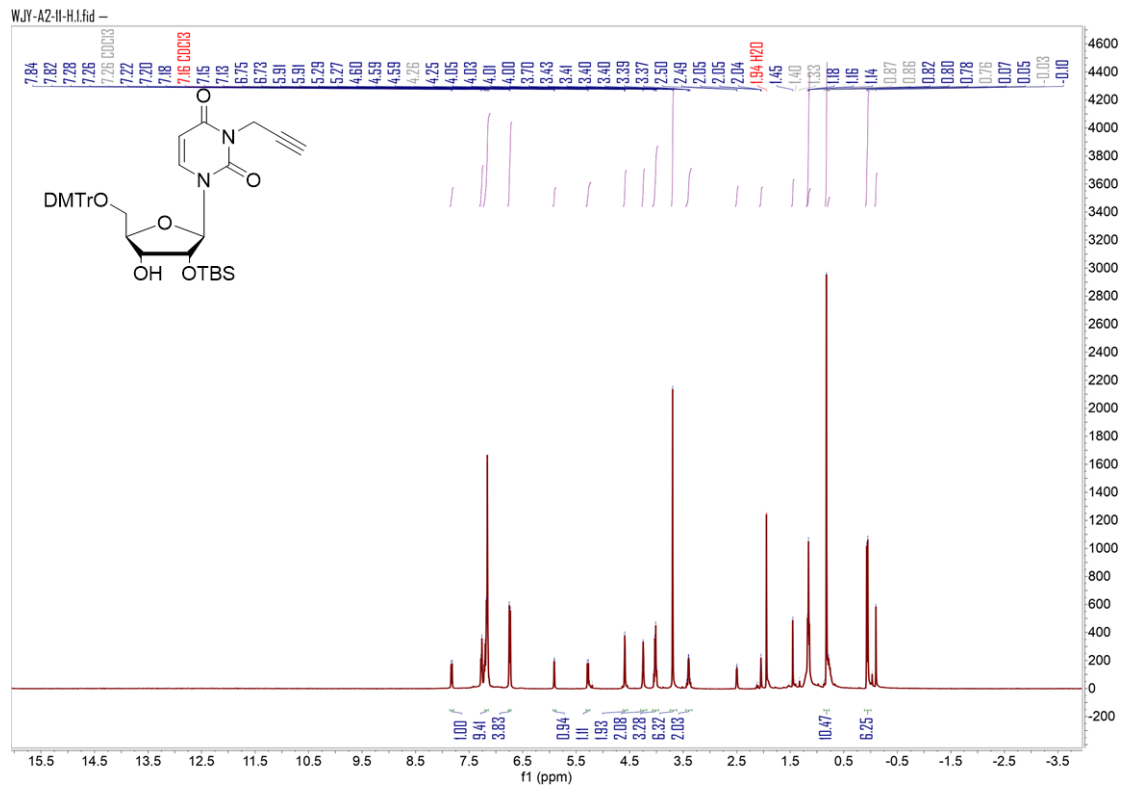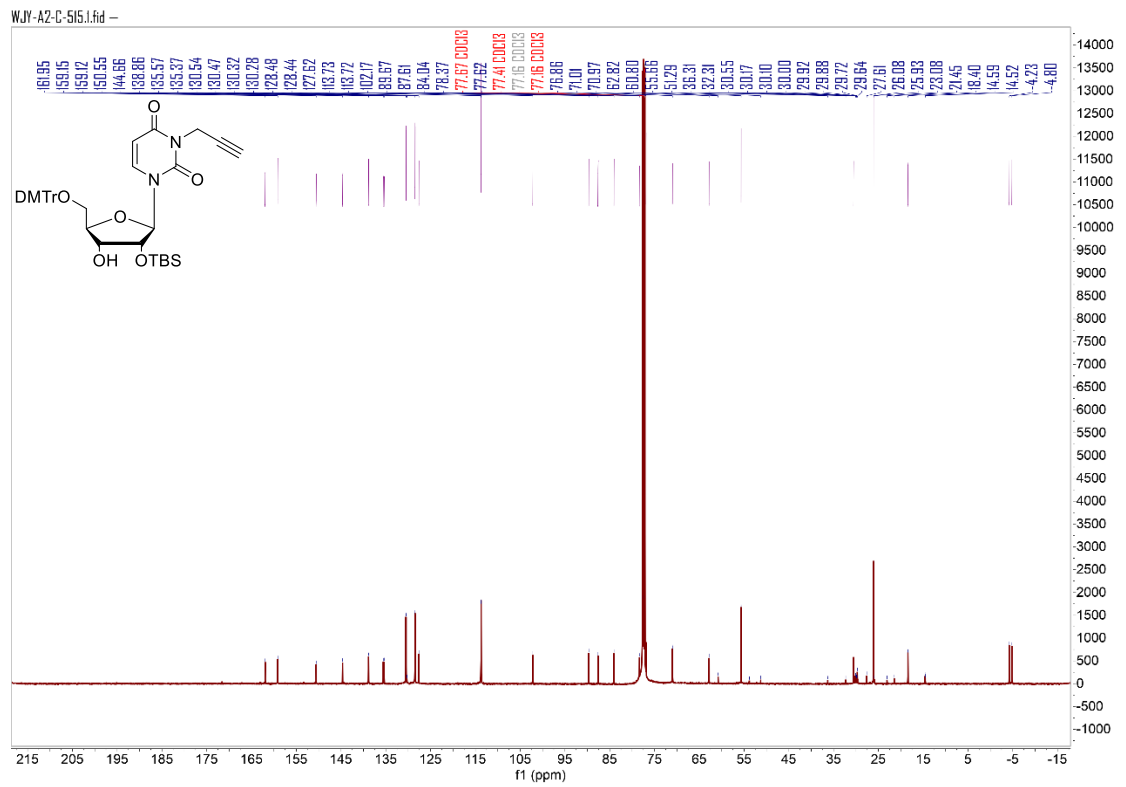

WJY-A2-11-HH.3.ser

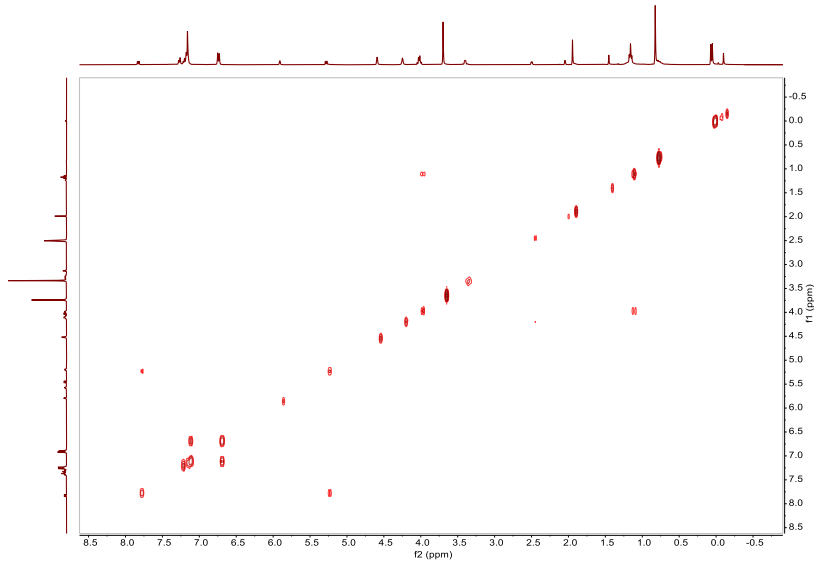

WJY-A3-1230.1.fid

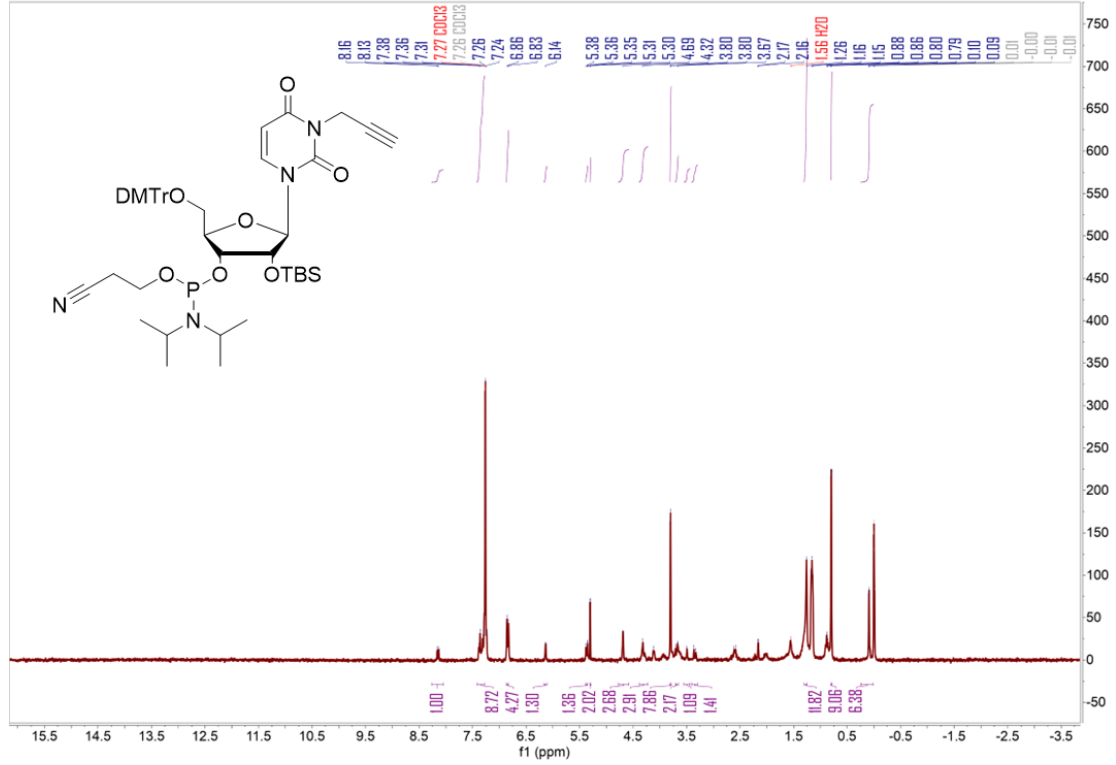

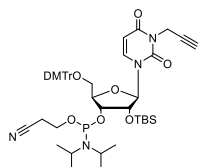

wjy-a3-h-511.2.fid -

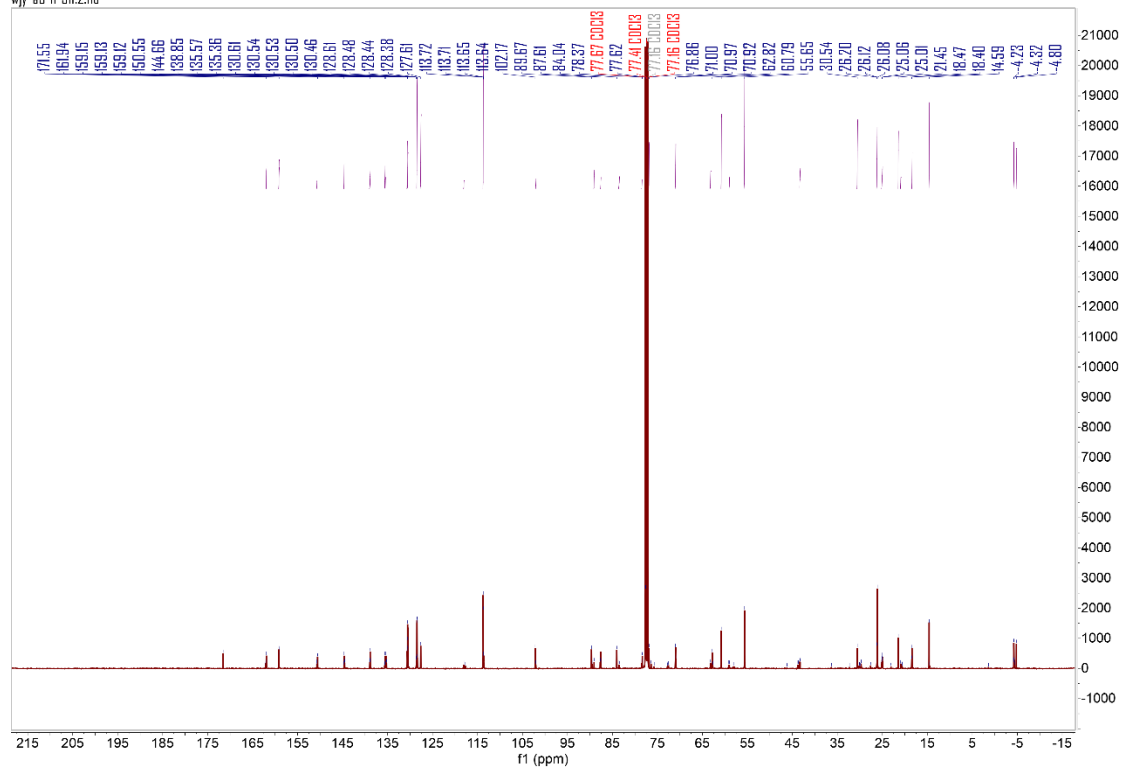

cqBBgSsn1xmiBuDVhmQVDA.2.fid -

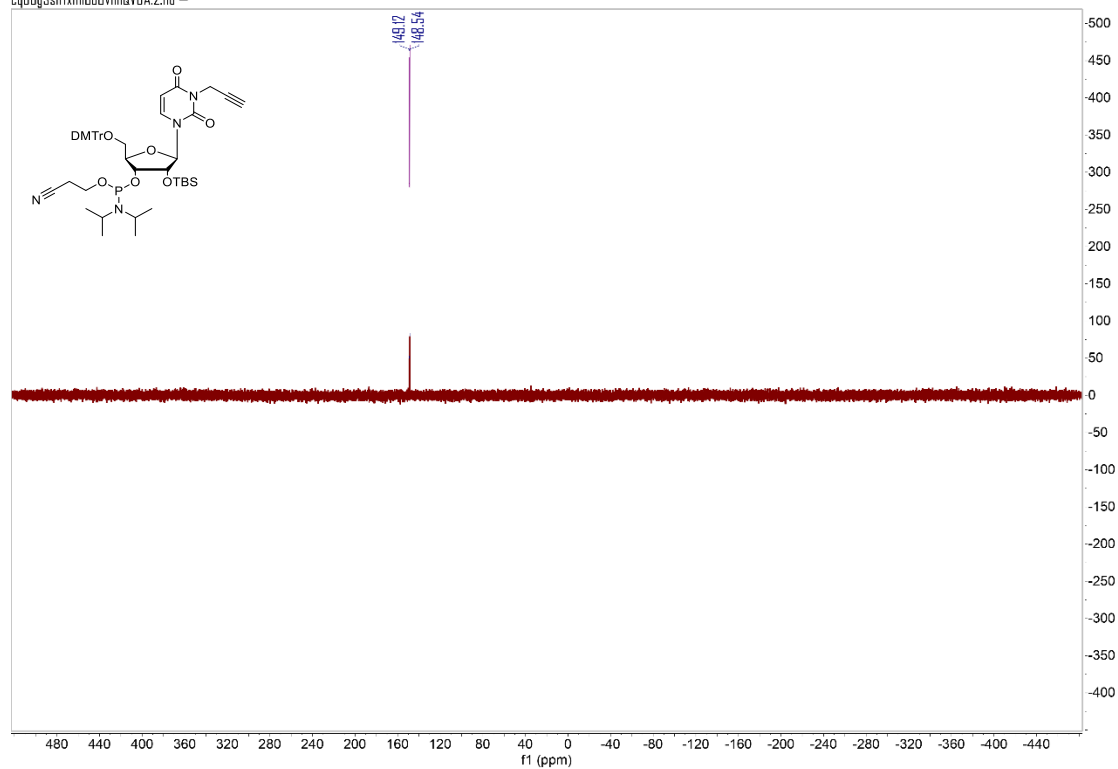

## References

- [1] Li-Jun Xie, Cui-Lian Lin, Li Liu, Liang Cheng, A chemical labeling of N6-formyl adenosine (f6A) RNA, *Chinese Chemical Letters*, Volume 33, Issue 3, **2022**, Pages 1563-1566.
- [2] Szlenkier, Maurycy; Kamel, Karol; Boryski, Jerzy, Regioselective Mitsunobu Reaction of Partially Protected Uridine. *Nucleosides, Nucleotides & Nucleic Acids* (**2016**), 35(8), 410-425
- [3] CN:117551155:B, Patent, **2024**.
